# Supplementary material for: Impact of reduced non-Gaussianity on analysis and forecast accuracy by assimilating every-30-second radar observation with ensemble Kalman filter: idealized experiments of deep convection
Source: Copernicus journal article supplement (doi:10.5194/egusphere-2025-2543), 2025-06-25
Supplement: Supplementary file [file supplement_figureA_AC3.pdf › supplement_figureA_AC3.pdf]

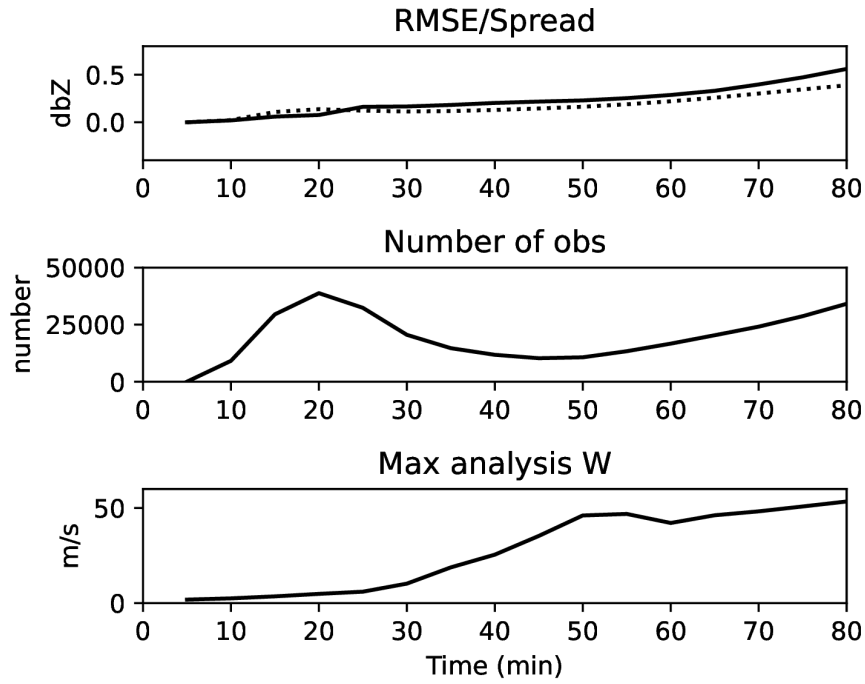

**Figure 1.** Time series of (a) analysis RMSE (solid line) against nature run and ensemble spread (dotted line) in reflectivity averaged over the entire domain, (b) the number of assimilated observations, (c) the maximum value of analysis ensemble mean vertical velocity. The result of 5MIN-3D is shown.
